# Supplementary material for: Cryo-EM structures reveal intricate Fe-S cluster arrangement and charging in Rhodobacter capsulatus formate dehydrogenase
Source: Springer Nature journal article supplement (doi:10.1038/s41467-020-15614-0), 2020-04-20
Supplement: MOESM1 [file 41467_2020_15614_MOESM1_ESM.pdf]

1 **Supplementary Information**

2 Cryo-EM structures reveal intricate Fe-S cluster arrangement and charging in *Rhodobacter*  
3 *capsulatus* formate dehydrogenase

4 Christin Radon, Gerd Mittelstädt *et al.*

5

6 **List of Content**

7 Supplementary Figures 1-8

8 Supplementary Tables 1-6

9

10

11

12

13

14

15

16

17

18

19

20

21

22

23

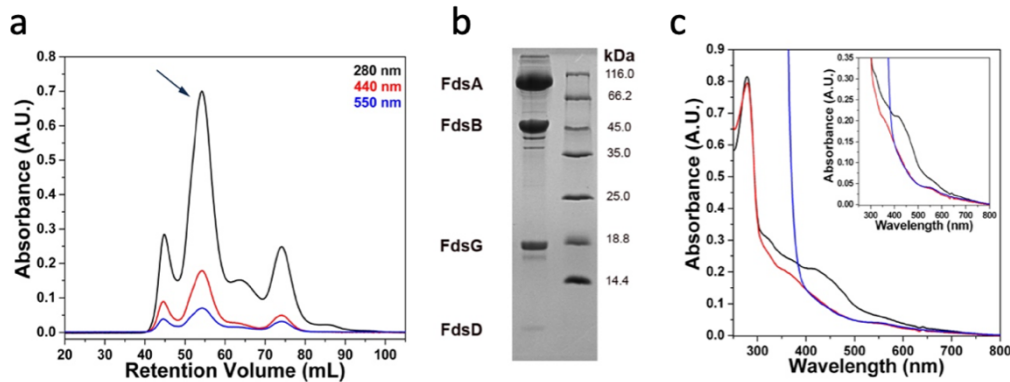

24

25 **Supplementary Figure 1 | Biochemical Characterization of RcFDH.** **a**, Size exclusion  
 26 chromatography of 90  $\mu$ M RcFDH performed on a Superdex200pg column in 75 mM potassium  
 27 phosphate, 10 mM NaN<sub>3</sub>, pH 7.5 at 4 °C. The purified fraction corresponding to the holoenzyme  
 28 is represented by the main fraction that eluted at approximately 55.0 mL and is indicated by an  
 29 arrow. Elution traces represent absorbance wavelengths at 280 nm (black trace), 440 nm (red  
 30 trace), and 550 nm (blue trace). **b**, 15% SDS-polyacrylamide gel of the purified RcFDH  
 31 holoenzyme. Gel depicts 46  $\mu$ g of purified FDH. Subunits corresponding to FdsA, FdsB, FdsG,  
 32 and FdsD are indicated. Reproducible gels could be obtained following at least 3 or more  
 33 independent purifications. **c**, UV-visible absorption spectra of as-isolated RcFDH (black trace)  
 34 that was subjected to immediate reduction with 5 mM sodium formate (red trace), followed by  
 35 treatment by 2 mM sodium dithionite (blue trace). Inset depicts a zoomed-in view of the features  
 36 present at 250-800 nm. Spectra were recorded in 100 mM Tris-HCl, 10 mM NaN<sub>3</sub>, pH 9.0  
 37 buffer under anaerobic conditions in a Coy chamber (< 10 ppm O<sub>2</sub>).

38

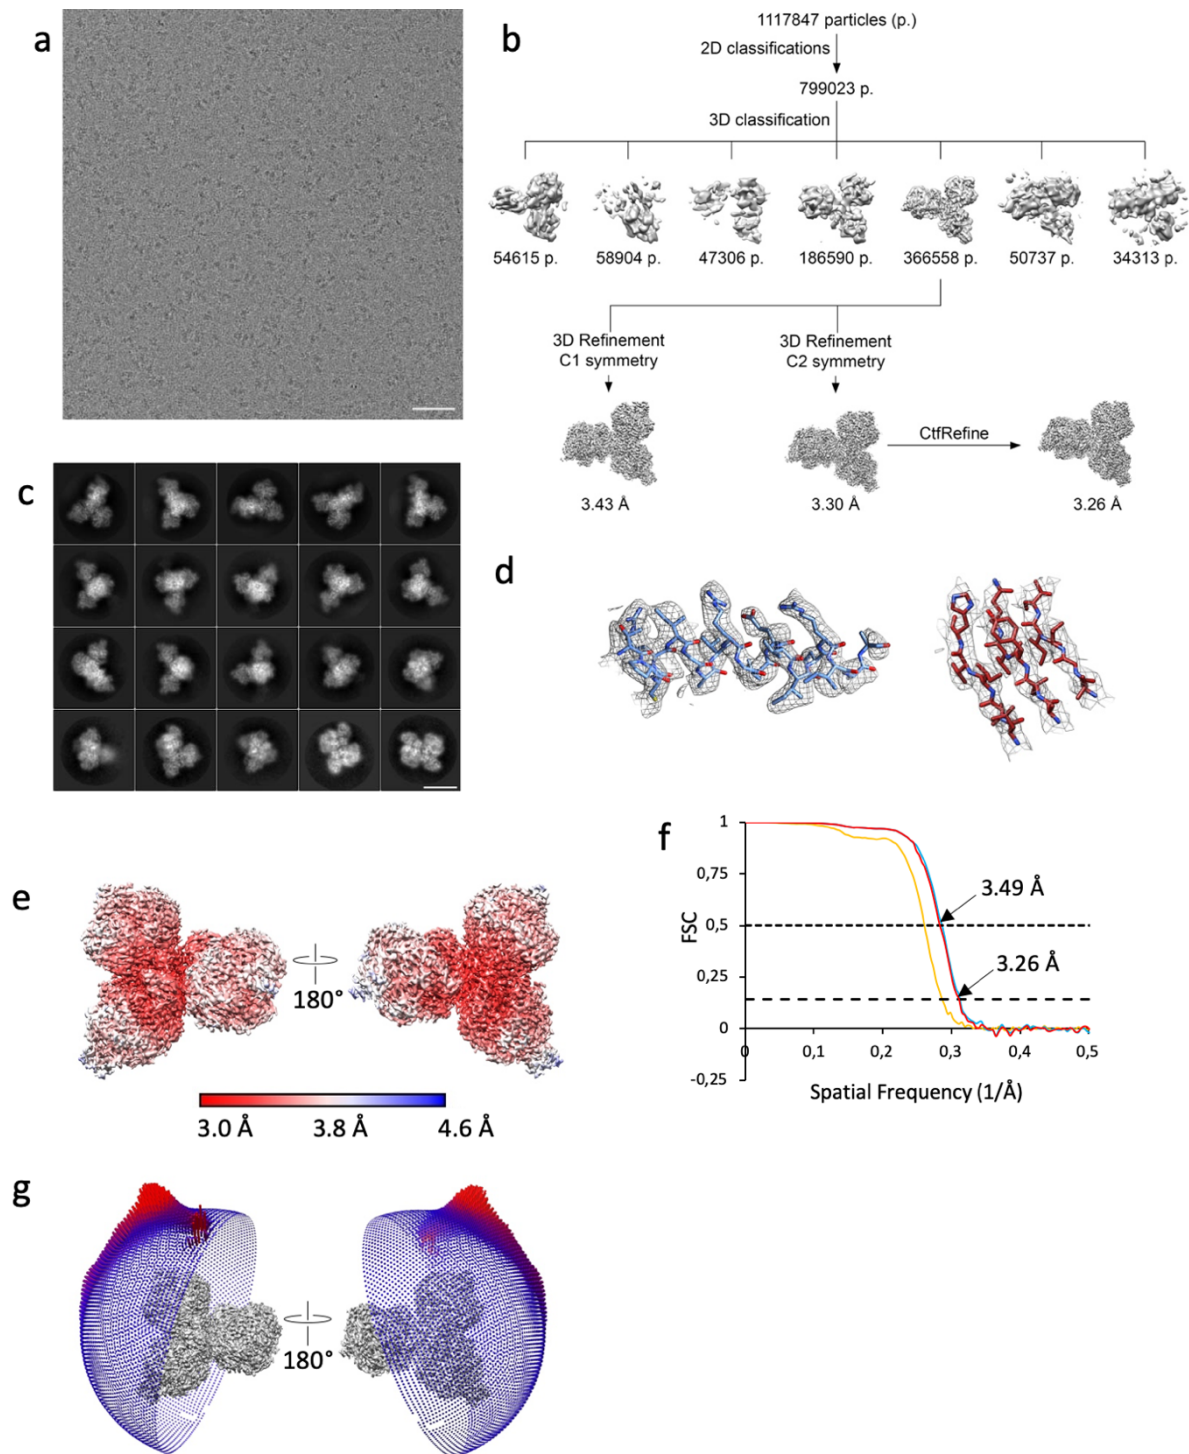

39

40 **Supplementary Figure 2 | Cryo-EM analysis of RCFDH.** **a**, A representative cryo-EM  
 41 micrograph of RCFDH data collection. Scale bar represents 500 Å. **b**, Data processing workflow  
 42 showing the image processing procedure with the number of particles and the resolution of the  
 43 reconstruction for every step. **c**, Representative 2D class averages of various views of RCFDH.  
 44 Scale bar represents 100 Å. **d**, Mesh representation of the map showing a representative  $\alpha$ -helix  
 45 and  $\beta$ -sheets superimposed on the atomic model. **e**, Local resolution estimate in Relion. Side  
 46 views of the density map coloured according to the local resolution estimated by Relion. **f**,  
 47 Fourier shell correlation (FSC) plots for the RCFDH EM map with imposed C2 symmetry. The

48 resolution at FSC=0.143 and FSC=0.5 are indicated. A comparison of the FSC corrected (red),  
49 masked (blue) and unmasked map (yellow) is shown. **g**, Angular distribution of the final  
50 reconstruction.  
51



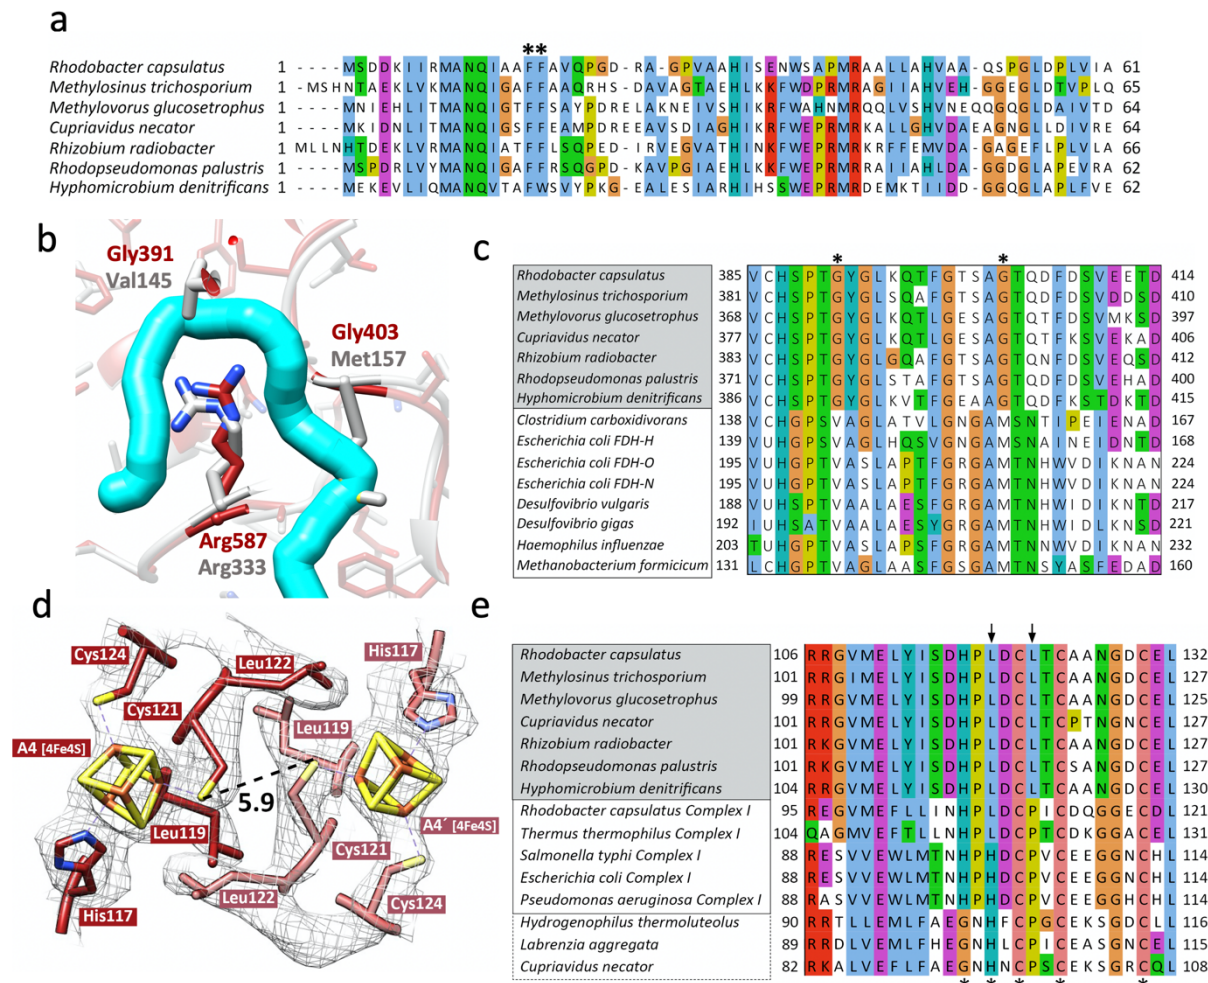

57  
58  
59  
60  
61  
62  
63  
64  
65  
66  
67  
68  
69  
70  
71  
72

**Supplementary Figure 4 | Channel and [4Fe-4S] cluster A4 of RcbFDH.** **a**, Multiple sequence alignment of FdsD homologues from NAD<sup>+</sup>-dependent FDHs. Stars indicate conserved phenylalanine residues. **b**, Superimposition of RcbFDH (red) and oxidised FdhF (PDB-ID: 1fdo; white) structures at active site. Active site residue Arg 587 and residues Gly<sup>391</sup> and Gly<sup>403</sup> of RcbFDH as well as Val<sup>141</sup> and Met<sup>157</sup> of FdhF are shown as sticks. The proposed hydrophobic channel is indicated in cyan. **c**, Multiple sequence alignment of FdsA homologues from organisms predicted to harbour FdsD (grey-shaded) or not (white-shaded). Stars indicate conserved glycine residues in NAD<sup>+</sup> dependent FDHs which are replaced by valine and methionine, respectively, in other FDHs. **d**, Dimer interface between the two FdsA subunits. [4Fe-4S] cluster A4 and A4' are shown. Cluster coordinating residues and hydrophobic residues at the dimer interface are shown as stick representation. The distance between sulphur atoms of Cys121 is indicated in Å. **e**, Multiple sequence alignment of FdsA homologues of several FDH, complex I and NAD<sup>+</sup>-reducing [NiFe]-hydrogenase family members. Residues that coordinate cluster A4 are indicated with stars. The arrows indicate Leu<sup>119</sup> and Leu<sup>122</sup>.

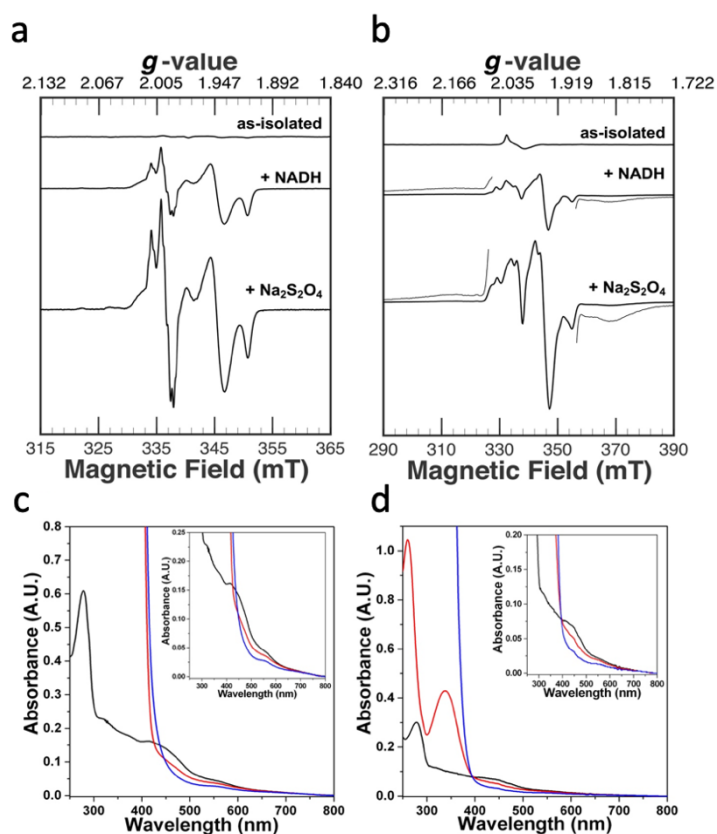

73  
74 **Supplementary Figure 5 | Spectroscopic characterization of RCFDH.** **a**, Constant wave X-  
75 band EPR spectra of RCFDH recorded at 80 K and **b**, 12 K at a microwave frequency of 9.38  
76 GHz. Spectra represent as isolated RCFDH treated in the absence or presence of NADH or  
77 sodium dithionite. An iron-sulphur cluster signal present in the low- and high-field edges of the  
78 NADH-treated and the dithionite-treated signals is partially enlarged at a scale of 5x. **c,d**, UV-  
79 visible spectra of FDH following treatment with NADH. **a** shows the Mo<sup>V</sup> and slowly-relaxing  
80 Fe-S clusters (as [2Fe-2S] or [4Fe-4S]) visible upon respective treatments. **b** emphasizes the  
81 presence of fast-relaxing Fe-S clusters that are not visible at 80 K, however some spectral  
82 components (e.g. Mo<sup>V</sup> and Fe-S clusters) are power-saturated. **c** shows as-isolated FDH (3.5  
83 μM) (black trace) that was subjected to reduction for 5 minutes at ambient temperature with 20  
84 mM NADH (red trace), followed by treatment by 2 mM sodium dithionite (blue trace). **d** shows  
85 as-isolated FDH (1.8 μM) (black trace) that was subjected to immediate reduction at ambient  
86 temperature with 40 μM NADH (red trace), followed by treatment by 2 mM sodium dithionite.  
87 Spectra were recorded in 100 mM Tris, 10 mM NaN<sub>3</sub>, pH 9.0 buffer under anaerobic conditions  
88 in a Coy chamber (< 10 ppm O<sub>2</sub>). Insets depict a zoomed-in view of the features present at 280-  
89 800 nm. The reduction spectra show that the enzyme is only partially reduced by NADH,  
90 independent of the NADH concentration used and the time of reduction. The absorbance of the  
91 red trace at 340 nm in **d** shows that NADH was not completely consumed during the reduction,  
92 also visible in **d** at much higher concentrations of NADH.

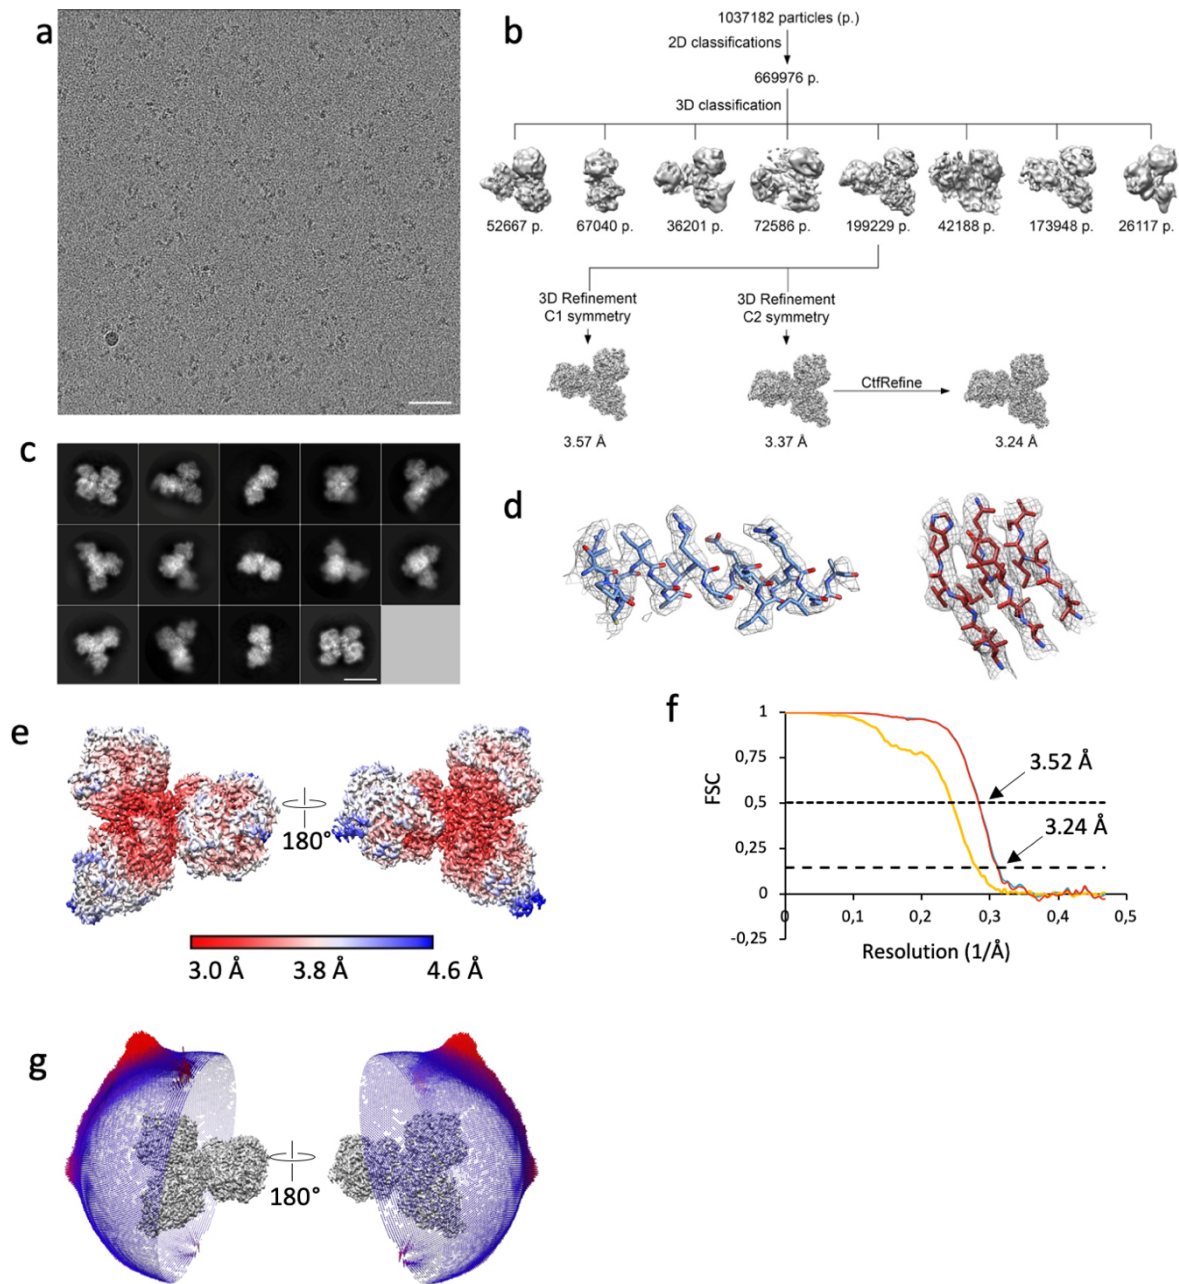

94

95 **Supplementary Figure 6 | Cryo-EM analysis of NADH incubated *RcFDH*.** **a**, A  
 96 representative cryo-EM micrograph of *RcFDH* data collection. Scale bar represents 500 Å. **b**,  
 97 Data processing workflow showing the image processing procedure with the number of  
 98 particles and the resolution of the reconstruction for every step. **c**, Representative 2D class  
 99 averages of various views of *RcFDH* calculated from selected particles. Scale bar represents  
 100 100 Å. **d**, Mesh representation of the map showing a representative  $\alpha$ -helix and  $\beta$ -sheets  
 101 superimposed on the atomic model. **e**, Local resolution estimate in Relion. Sideview of the  
 102 density map coloured according to the local resolution estimated by Relion. **f**, Fourier shell  
 103 correlation (FSC) plots for the *RcFDH* EM map with imposed C2 symmetry. The resolution at



104 FSC=0.143 and FSC=0.5 are indicated. A comparison of the FSC corrected (red), masked (blue)  
105 and unmasked map (yellow) is shown. **g**, Angular distribution of the final reconstruction.

106

107

108

109

110

111

112

113

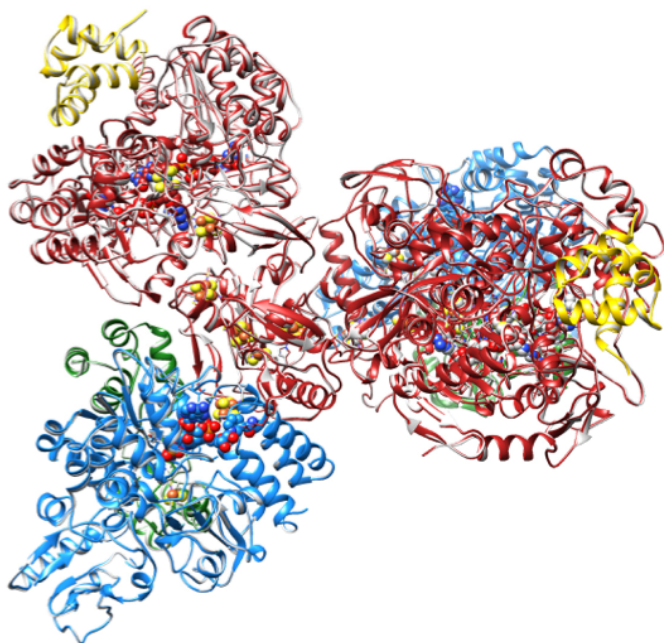

114

115 **Supplementary Figure 7 | Overlay of ribbon representation of as isolated *RcFDH***  
116 **structure and NADH reduced *RcFDH* structure.** As isolated *RcFDH* structure is shown in  
117 light grey, NADH reduced *RcFDH* structure depicted in colour code: FdsA, red; FdsB, blue;  
118 FdsG, green; FdsD, yellow.

119

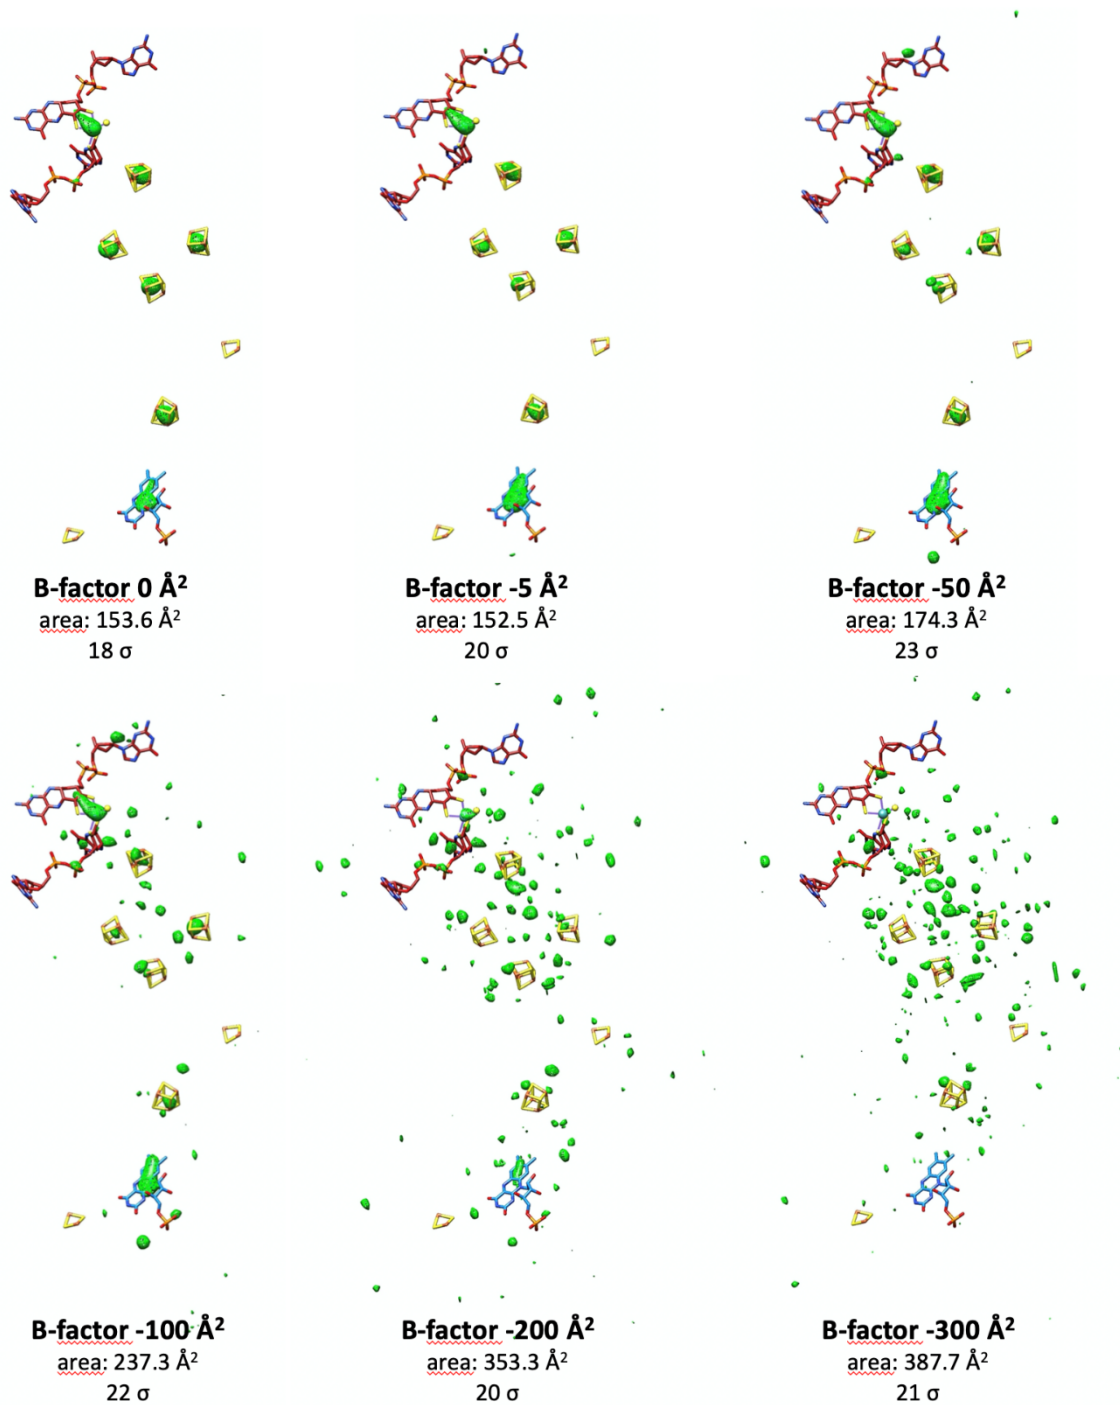

120

121 **Supplementary Figure 8 | Influence of B-factor sharpening on difference maps between**

122 **as isolated and NADH reduced cryo-EM maps of RcFDH.** Surface representations of

123 difference maps between as isolated and NADH reduced cryo-EM maps. Cryo-EM maps of as

124 isolated and NADH reduced FDH were B-factor sharpened prior subtraction. For comparison

125 all difference maps were scaled to the same enclosed volume ( $58.8 \text{\AA}^3$ ). Applied B-factors, the

126 total surface area and sigma values are given for each difference map. Cofactors are shown in

127 stick representation.

128

129

130 **Supplementary Tables**

131

132 **Supplementary Table 1 | Similarity scores (RMSD) of FDH components to closely related**133 **structures**

| <b>RcFDH-<br/>chain<sup>a</sup></b> | <b>pdb ID</b> | <b>Protein<br/>name</b> | <b>Homologous protein</b>                     | <b>r.m.s.d. in Å<sup>b</sup></b> | <b>identity<sup>c</sup></b> | <b>similarity<sup>c</sup></b> |
|-------------------------------------|---------------|-------------------------|-----------------------------------------------|----------------------------------|-----------------------------|-------------------------------|
| FdsA                                | 5xf9_B        | HoxU                    | NAD <sup>+</sup> -reducing [NiFe]-hydrogenase | 1.159 (141)                      | 35%                         | 50%                           |
| FdsA                                | 1fdo          | FdhF                    | Formate dehydrogenase H                       | 1.132 (554)                      | 36%                         | 53%                           |
| FdsA                                | 3ml1          | NapA                    | Periplasmatic nitrate reductase               | 1.110 (463)                      | 23%                         | 38%                           |
| FdsA                                | 1h0h          | FdhA                    | Tungsten containing formate dehydrogenase     | 1.184 (398)                      | 21%                         | 38%                           |
| FdsA                                | 1kqf          | FdnG                    | Formate dehydrogenase N                       | 1.080 (436)                      | 22%                         | 36%                           |
| FdsA                                | 3iam_3        | Nqo3                    | Respiratory complex I                         | 1.195 (305)                      | 29%                         | 44%                           |
| FdsB                                | 1m2d          | Fdx4                    | Thioredoxin-like ferredoxin                   | 0.884 (31)                       | n.d.                        | n.d.                          |
| FdsB                                | 3iam_1        | Nqo1                    | Respiratory complex I                         | 1.099 (311)                      | 35%                         | 48%                           |
| FdsG                                | 3iam_2        | Nqo2                    | Respiratory complex I                         | 1.254 (88)                       | 31%                         | 51%                           |
| FdsABGD                             |               | FdsABGD                 | Formate dehydrogenase NADH-reduced            | 0.305 (1659)                     | 100%                        | 100%                          |

<sup>a</sup> as isolated<sup>b</sup> number of pruned C $\alpha$  atoms in brackets<sup>c</sup> obtained using BLAST 2 sequences

n.d. - not detected

134 **Supplementary Table 2** | Amino acid composition of hydrophilic tunnel in *RcFDH* and *E.*  
 135 *coli* FdhF (PDB-ID: 1fdo)

|                    | <b>RcFDH</b>            | <b>1fdo</b>        |
|--------------------|-------------------------|--------------------|
| conserved residues | FdsA-Ser <sup>356</sup> | Ser <sup>109</sup> |
|                    | FdsA-Cys <sup>382</sup> | Cys <sup>136</sup> |
|                    | FdsA-Arg <sup>384</sup> | Arg <sup>138</sup> |
|                    | FdsA-His <sup>387</sup> | His <sup>141</sup> |
|                    | FdsA-Arg <sup>587</sup> | Arg <sup>333</sup> |
|                    | FdsA-Gln <sup>589</sup> | Gln <sup>335</sup> |
|                    | FdsA-Gln <sup>593</sup> | Gln <sup>339</sup> |
|                    | FdsA-Cys <sup>596</sup> | Cys <sup>342</sup> |
|                    | FdsA-Tyr <sup>608</sup> | Tyr <sup>356</sup> |
|                    | FdsA-Arg <sup>635</sup> | Arg <sup>382</sup> |
|                    | FdsA-Thr <sup>919</sup> | Thr <sup>673</sup> |
|                    | FdsA-Lys <sup>395</sup> | His <sup>149</sup> |
|                    | FdsA-His <sup>603</sup> | Asp <sup>349</sup> |
|                    | FdsA-Glu <sup>604</sup> | Thr <sup>350</sup> |
| exclusive          | FdsA-Ser <sup>388</sup> |                    |
|                    | FdsA-Ser <sup>401</sup> |                    |
|                    | FdsD-Asn <sup>33</sup>  |                    |
|                    |                         | Cys <sup>135</sup> |
|                    |                         | Asp <sup>134</sup> |
|                    |                         | Tyr <sup>586</sup> |

136  
 137  
 138  
 139  
 140  
 141  
 142  
 143  
 144  
 145  
 146  
 147  
 148

149 **Supplementary Table 3** | Amino acid composition of hydrophobic tunnel in *RcFDH* and *E.*  
150 *coli* FdhF

151

|                       | <b><i>RcFDH</i></b> | <b><i>1fdo</i></b>  |
|-----------------------|---------------------|---------------------|
| identical             | Ala <sup>383</sup>  | Ala <sup>137</sup>  |
|                       | Leu <sup>394</sup>  | Leu <sup>148</sup>  |
|                       | Val <sup>592</sup>  | Val <sup>338</sup>  |
|                       | Pro <sup>585</sup>  | Pro <sup>331</sup>  |
| Conserved hydrophobic | Gly <sup>391</sup>  | Val <sup>145</sup>  |
|                       | Gly <sup>403</sup>  | Met <sup>157*</sup> |
|                       | Phe <sup>407</sup>  | Ile <sup>162</sup>  |
|                       | Val <sup>429</sup>  | Ile <sup>183</sup>  |
|                       | Phe <sup>430</sup>  | Val <sup>184</sup>  |
|                       | Leu <sup>586</sup>  | Val <sup>332</sup>  |
|                       | Phe <sup>601</sup>  | Leu <sup>347</sup>  |

\*extend into tunnel

152

153

154 **Supplementary Table 4** | *Rc*FDH spin concentration from EPR spectra

| Sample Preparation Condition                           | [Spin] ( $\mu\text{M}$ ) | [Spin]/[FDH] <sub>protomer</sub> |
|--------------------------------------------------------|--------------------------|----------------------------------|
| as-isolated (12 K)                                     | 3                        | 0.03                             |
| + NADH (12 K)                                          | 38                       | 0.38                             |
| + NADH (80 K)                                          | 51                       | 0.51                             |
| + Na <sub>2</sub> S <sub>2</sub> O <sub>4</sub> (12 K) | 131                      | 1.31                             |
| + Na <sub>2</sub> S <sub>2</sub> O <sub>4</sub> (80 K) | 112                      | 1.12                             |

155  
 156  
 157  
 158  
 159  
 160  
 161  
 162  
 163  
 164  
 165  
 166  
 167  
 168  
 169  
 170  
 171  
 172  
 173  
 174  
 175  
 176  
 177  
 178  
 179

180 **Supplementary Table 5** | EM data collection, processing and refinement statistics

|                                                  | FDH as isolated<br>(EMDB-10496)<br>(PDB 6TGA) | FDH NADH reduced<br>(EMDB-10495)<br>(PDB 6TG9) |
|--------------------------------------------------|-----------------------------------------------|------------------------------------------------|
| <b>Data collection and processing</b>            |                                               |                                                |
| Magnification                                    | 31000                                         | 31000                                          |
| Voltage (kV)                                     | 300                                           | 300                                            |
| Electron exposure (e-/Å <sup>2</sup> )           | 64                                            | 40                                             |
| Defocus range (µm)                               | 0.5-3.2                                       | 0.6-4.4                                        |
| Pixel size (Å)                                   | 0.628                                         | 1.07                                           |
| Symmetry imposed                                 | C2                                            | C2                                             |
| Initial particle images (no.)                    | 799,023                                       | 669,976                                        |
| Final particle images (no.)                      | 366,573                                       | 199,229                                        |
| Map resolution (Å)                               | 3.26                                          | 3.23                                           |
| FSC threshold                                    | 0.143                                         | 0.143                                          |
| Map resolution range (Å)                         | 3.0-4.0                                       | 3.0-4.6                                        |
| <b>Refinement</b>                                |                                               |                                                |
| Initial model used (PDB code)                    | <i>de novo</i>                                | <i>de novo</i>                                 |
| Model resolution (Å)                             | 3.26                                          | 3.24                                           |
| FSC threshold                                    | 0.143                                         | 0.143                                          |
| Model resolution range (Å)                       | 3.0-4.0                                       | 3.0-4.6                                        |
| Map sharpening <i>B</i> factor (Å <sup>2</sup> ) | 167                                           | 130                                            |
| Model composition                                |                                               |                                                |
| Non-hydrogen atoms                               | 25,324                                        | 25,412                                         |
| Protein residues                                 | 3,318                                         | 3,318                                          |
| Ligands                                          | 24                                            | 26                                             |
| <i>B</i> factors (Å <sup>2</sup> )               |                                               |                                                |
| Protein                                          | 11.78                                         | 19.72                                          |
| Ligand                                           | 9.78                                          | 15.60                                          |
| R.m.s. deviations                                |                                               |                                                |
| Bond lengths (Å)                                 | 0.0007                                        | 0.014                                          |
| Bond angles (°)                                  | 0.996                                         | 1.161                                          |
| Validation                                       |                                               |                                                |
| MolProbity score                                 | 1.84                                          | 2.06                                           |
| Clashscore                                       | 8.35                                          | 11.37                                          |
| Poor rotamers (%)                                | 0.98                                          | 0.47                                           |
| Ramachandran plot                                |                                               |                                                |
| Favored (%)                                      | 94.25                                         | 91.97                                          |
| Allowed (%)                                      | 5.45                                          | 7.78                                           |
| Disallowed (%)                                   | 0.30                                          | 0.24                                           |

181  
182  
183  
184  
185  
186  
187  
188  
189  
190  
191



192 **Supplementary Table 6** | Primer sequences used in this study

| Construct | Primers (5'-3')        |                      |
|-----------|------------------------|----------------------|
|           | His6_Csp6I_fw          | fdsDXho_rv           |
| pTHfds36  | CAGTACATGGGCAGCAGCCATC | GCTCGAGTGGAAACGATGAC |

193
